# Supplementary material for: Epigenetic ageing is distinct from senescence-mediated ageing and is not prevented by telomerase expression
Source: PubMed Central journal article supplement (PMC6224244; doi:10.18632/aging.101588), 2018-10-17
Supplement: aging-10-101588-s003.pdf [file aging-10-101588-s003.pdf]

(A)

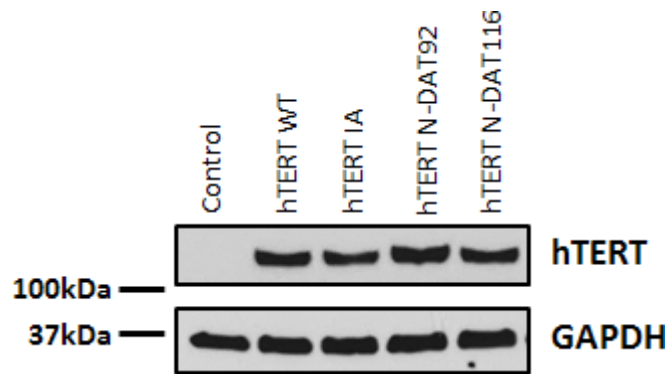

(B)

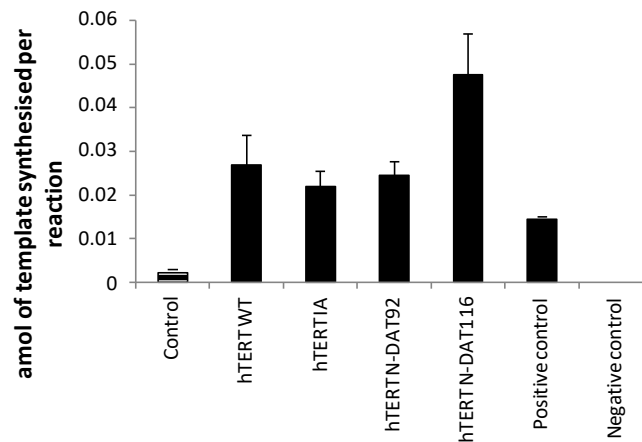

**Supplementary Figure 3.** (A) Western blot analysis of hTERT protein in human foreskin fibroblasts harbouring various hTERT constructs. (B) Telomerase catalytic activity (TRAP) assay on the same samples. Bars represent amount of artificial template in atto mole synthesised by telomerase in each sample.
