# Supplementary material for: Epigenetic ageing is distinct from senescence-mediated ageing and is not prevented by telomerase expression
Source: publisher site journal article supplement (doi:10.18632/aging.101588), 2018-10-17
Supplement: Supplementary file [file aging-v10i10-101588-supplementary-material-SD1.pdf]

SUPPLEMENTARY MATERIAL

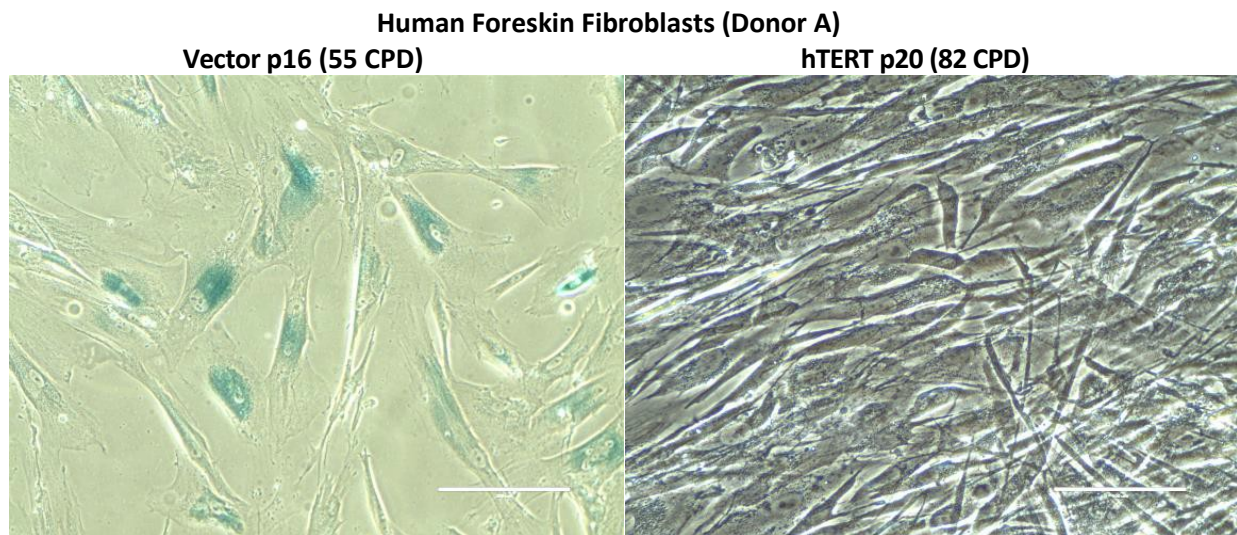

**Supplementary Figure 1. Senescence-associated  $\beta$ -galactosidase assay on Human Foreskin Fibroblasts** infected either with hTERT or empty vector at high cumulative population doubling (CPD). Scale bar measures 200 $\mu$ m.
