# Supplementary material for: Epigenetic ageing is distinct from senescence-mediated ageing and is not prevented by telomerase expression
Source: publisher site journal article supplement (doi:10.18632/aging.101588), 2018-10-17
Supplement: Supplementary file [file aging-v10i10-101588-supplementary-material-SD2.pdf]

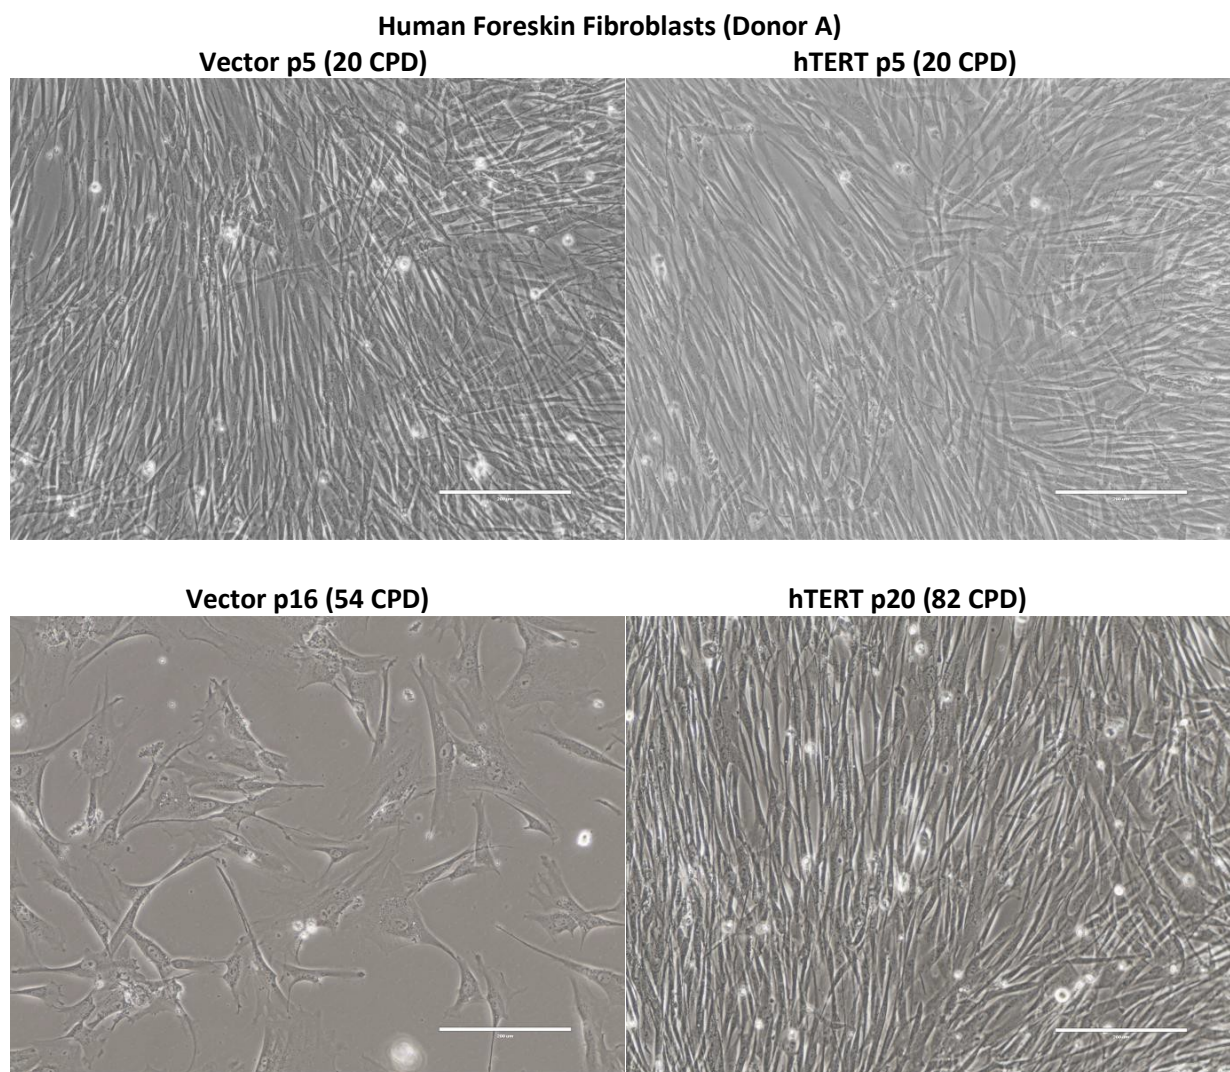

**Supplementary Figure 2A. Phase contrast pictures of Human Foreskin Fibroblasts** harbouring either hTERT expressing vector or empty vector at low and high cumulative population doubling (CPD). Scale bar measures 200 $\mu$ m.

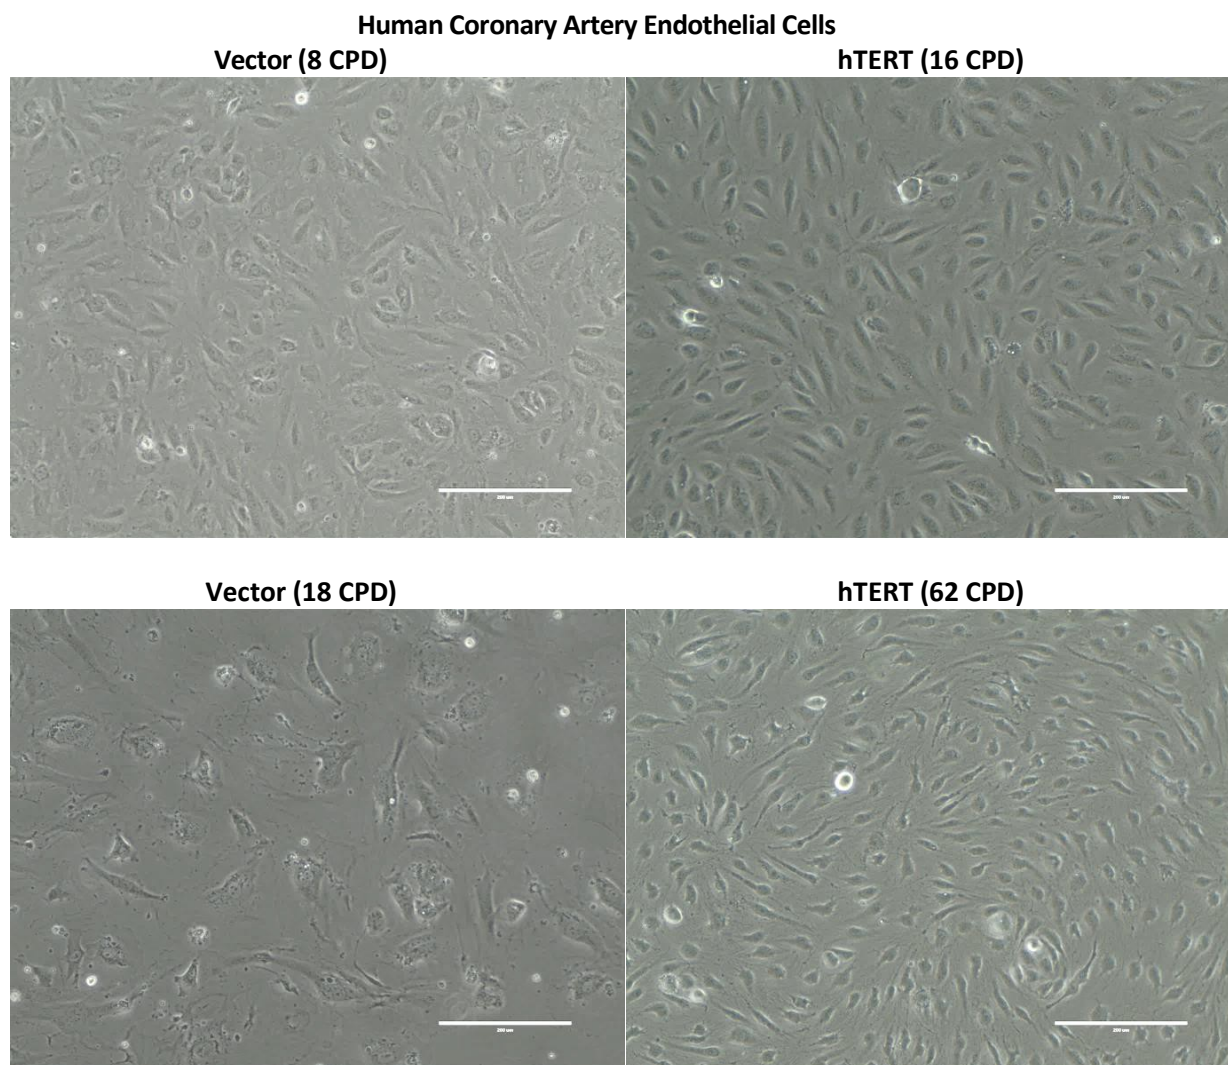

**Supplementary Figure 2B. Phase contrast pictures of Human Coronary Artery Endothelial Cells** harbouring either hTERT expressing vector or empty vector at low and high cumulative population doubling (CPD). Scale bar measures 200 $\mu$ m.
